# Supplementary material for: Assessment of Hospital-Onset SARS-CoV-2 Infection Rates and Testing Practices in the US, 2020-2022
Source: PubMed Central journal article supplement (PMC10463096; doi:10.1001/jamanetworkopen.2023.29441), 2023-08-28

## Supplemental Online Content

Hatfield KM, Baggs J, Maillis A, et al. Assessment of hospital-onset SARS-CoV-2 infection rates and testing practices in the US. *JAMA Netw Open*. 2023;6(8):e2329441. doi:10.1001/jamanetworkopen.2023.29441

**eFigure 1.** Overall Post-Admission Testing Rates, Stratified by the Proportion of Hospitalizations Screened at Admission

**eTable 1.** Hospitalization Characteristics of Individuals Stratified by SARS-CoV-2 Infection Status

**eFigure 2.** Aggregate Percent of All Hospitalizations With Community-Onset SARS-CoV-2 Infection, Stratified by the Proportion of Hospitalizations Screened at Admission

**eFigure 3.** Aggregate Percent of All Hospitalizations With Unknown-Onset SARS-CoV-2 Infection, Stratified by the Proportion of Hospitalizations Screened at Admission

**eTable 2.** Hospital-Onset SARS-CoV-2 Infections, Stratified by Community-Onset SARS-CoV-2 Infection Rates

**eFigure 4.** Aggregate Hospital-Onset SARS-CoV-2 Infection Rates Using 3 Definitions

**eFigure 5.** Aggregate Hospital-Onset SARS-CoV-2 Infection Rates per 1000 Patient-Days Stratified by the Proportion of Hospitalizations Screened at Admission

This supplemental material has been provided by the authors to give readers additional information about their work.

**eFigure 1.** Overall Post-Admission Testing Rates, Stratified by the Proportion of Hospitalizations Screened at Admission.

(a) Early post-admission testing (i.e., number of tests on days 4-7 of admission per 1,000 patient-days).

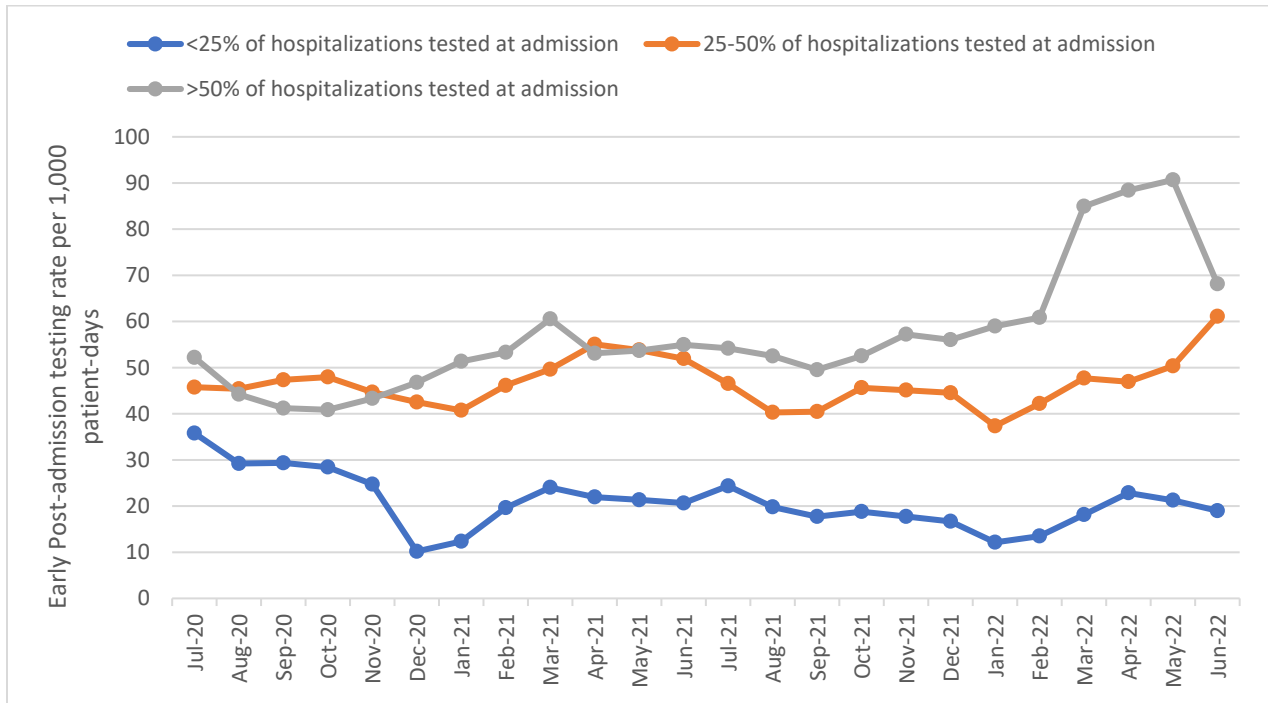

(b) Late post-admission testing (i.e., number of tests after day 7 of admission per 1,000 patient-days)

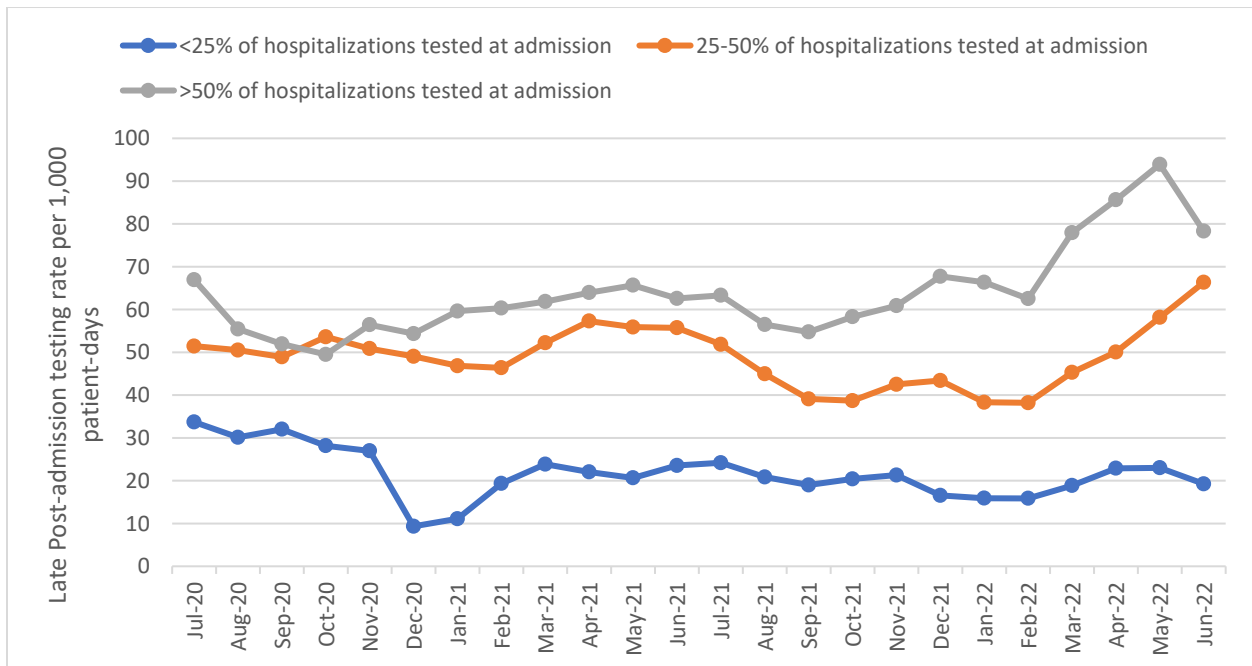

**eTable 1.** Hospitalization Characteristics of Individuals Stratified by SARS-CoV-2 Infection Status

|                                              | No Positive test for SARS-CoV-2 or diagnosis code for COVID-19 |       | Unknown-Onset SARS-CoV-2 Infection |       | Community-Onset SARS-CoV-2 Infection |        | Indeterminate-Onset SARS-CoV-2 Infection |        | Hospital-Onset SARS-CoV-2 Infection |         |
|----------------------------------------------|----------------------------------------------------------------|-------|------------------------------------|-------|--------------------------------------|--------|------------------------------------------|--------|-------------------------------------|---------|
| <b>Total (Row %)</b>                         | 4,062,216                                                      | 95.4% | 187,488                            | 4.4%  | 157,518                              | 3.6%   | 6,455                                    | 0.1%   | 7,591                               | 0.2%    |
| <b>Age (Years)</b>                           |                                                                |       |                                    |       |                                      |        |                                          |        |                                     |         |
| < 1                                          | 502,515                                                        | 12.4% | 752                                | 0.4%  | 396                                  | 0.3%   | 13                                       | 0.2%   | 15                                  | 0.2%    |
| 1 - 17                                       | 65,008                                                         | 1.6%  | 2,244                              | 1.2%  | 852                                  | 0.5%   | 36                                       | 0.6%   | 29                                  | 0.4%    |
| 18 - 44                                      | 955,036                                                        | 23.5% | 34,765                             | 18.5% | 28,323                               | 18.0%  | 698                                      | 10.8%  | 714                                 | 9.4%    |
| 45 - 64                                      | 935,537                                                        | 23.0% | 62,674                             | 33.4% | 48,798                               | 31.0%  | 1,684                                    | 26.1%  | 2,310                               | 30.4%   |
| 65 - 84                                      | 1,281,996                                                      | 31.6% | 70,357                             | 37.5% | 62,171                               | 39.5%  | 2,917                                    | 45.2%  | 3,648                               | 48.1%   |
| 85+                                          | 322,124                                                        | 7.9%  | 16,696                             | 8.9%  | 16,978                               | 10.8%  | 1,107                                    | 17.1%  | 875                                 | 11.5%   |
| <b>Race and Ethnicity</b>                    |                                                                |       |                                    |       |                                      |        |                                          |        |                                     |         |
| White, non-Hispanic                          | 2,661,748                                                      | 65.5% | 120,819                            | 64.4% | 91,648                               | 58.2%  | 4,241                                    | 65.7%  | 4,706                               | 62.0%   |
| Black, non-Hispanic                          | 611,294                                                        | 15.0% | 28,889                             | 15.4% | 29,502                               | 18.7%  | 1,062                                    | 16.5%  | 1,436                               | 18.9%   |
| Hispanic                                     | 421,415                                                        | 10.4% | 23,104                             | 12.3% | 23,347                               | 14.8%  | 703                                      | 10.9%  | 822                                 | 10.8%   |
| Asian, non-Hispanic                          | 105,009                                                        | 2.6%  | 3,991                              | 2.1%  | 3,541                                | 2.2%   | 99                                       | 1.5%   | 141                                 | 1.9%    |
| Other, non-Hispanic                          | 168,589                                                        | 4.2%  | 7,521                              | 4.0%  | 7,151                                | 4.5%   | 249                                      | 3.9%   | 337                                 | 4.4%    |
| Unknown                                      | 94,161                                                         | 2.3%  | 3,164                              | 1.7%  | 2,329                                | 1.5%   | 101                                      | 1.6%   | 149                                 | 2.0%    |
| <b>Sex</b>                                   |                                                                |       |                                    |       |                                      |        |                                          |        |                                     |         |
| Female                                       | 2,288,856                                                      | 56.3% | 93,071                             | 49.6% | 78,537                               | 49.9%  | 3,252                                    | 50.4%  | 3,356                               | 44.2%   |
| Male                                         | 1,773,164                                                      | 43.7% | 94,409                             | 50.4% | 78,980                               | 50.1%  | 3,203                                    | 49.6%  | 4,235                               | 55.8%   |
| <b>Insurance</b>                             |                                                                |       |                                    |       |                                      |        |                                          |        |                                     |         |
| Medicare                                     | 1,761,154                                                      | 43.4% | 93,406                             | 49.8% | 83,904                               | 53.3%  | 4,231                                    | 65.5%  | 4,895                               | 64.5%   |
| Medicaid                                     | 862,341                                                        | 21.2% | 24,076                             | 12.8% | 21,443                               | 13.6%  | 706                                      | 10.9%  | 931                                 | 12.3%   |
| Commercially Insured                         | 1,126,560                                                      | 27.7% | 55,105                             | 29.4% | 38,219                               | 24.3%  | 1,113                                    | 17.2%  | 1,354                               | 17.8%   |
| Other                                        | 312,161                                                        | 7.7%  | 14,901                             | 7.9%  | 13,952                               | 8.9%   | 405                                      | 6.3%   | 411                                 | 5.4%    |
| <b>Length of Stay, Median (Q1-Q3)</b>        | 3                                                              | 2 - 5 | 3                                  | 5 - 9 | 5                                    | 3 - 10 | 8                                        | 6 - 14 | 20                                  | 14 - 32 |
| <b>Diagnosis code for COVID-19 infection</b> | 0                                                              | 0%    | 187,488                            | 100%  | 151,076                              | 95.9%  | 5,573                                    | 86.3%  | 6,779                               | 89.3%   |
| <b>Tested negative at admission</b>          | 1,476,219                                                      | 36.3% | 4,107                              | 2.2%  | -                                    | -      | 2,084                                    | 32.3%  | 2,986                               | 39.3%   |
| <b>Mechanical Ventilation</b>                | 231,202                                                        | 5.7%  | 22,349                             | 11.9% | 20,550                               | 13.0%  | 902                                      | 14.0%  | 2,542                               | 33.5%   |
| <b>Intensive Care Unit Stay</b>              | 584,393                                                        | 14.4% | 37,377                             | 19.9% | 34,720                               | 22.0%  | 1,582                                    | 24.5%  | 3,703                               | 48.8%   |
| <b>Discharge Status</b>                      |                                                                |       |                                    |       |                                      |        |                                          |        |                                     |         |
| Home or self-care                            | 2,683,755                                                      | 66.1% | 104,700                            | 55.8% | 82,292                               | 52.2%  | 1,708                                    | 26.5%  | 1,054                               | 13.9%   |
| Hospice Care                                 | 93,243                                                         | 2.3%  | 5,815                              | 3.1%  | 5,519                                | 3.5%   | 325                                      | 5.0%   | 455                                 | 6.0%    |
| Expired                                      | 87,548                                                         | 2.2%  | 18,835                             | 10.0% | 16,964                               | 10.8%  | 620                                      | 9.6%   | 1,439                               | 19.0%   |

|                               |           |       |         |       |         |       |       |       |       |       |
|-------------------------------|-----------|-------|---------|-------|---------|-------|-------|-------|-------|-------|
| Other                         | 1,197,670 | 29.5% | 58,138  | 31.0% | 52,743  | 33.5% | 3,802 | 58.9% | 4,643 | 61.2% |
| <b>Time Period</b>            |           |       |         |       |         |       |       |       |       |       |
| Pre-Delta                     | 2,020,260 | 49.7% | 87,337  | 46.6% | 84,215  | 53.5% | 3,519 | 54.5% | 4,249 | 56.0% |
| Delta                         | 889,979   | 21.9% | 43,846  | 23.4% | 32,985  | 20.9% | 1,035 | 16.0% | 1,243 | 16.4% |
| Omicron                       | 1,151,977 | 28.4% | 56,305  | 30.0% | 40,318  | 25.6% | 1,901 | 29.5% | 2,099 | 27.7% |
| <b>Hospital Census Region</b> |           |       |         |       |         |       |       |       |       |       |
| Northeast                     | 540,867   | 13.3% | 18,066  | 9.6%  | 21,268  | 13.5% | 921   | 14.3% | 1,176 | 15.5% |
| Midwest                       | 882,430   | 21.7% | 42,972  | 22.9% | 26,161  | 16.6% | 1,082 | 16.8% | 1,155 | 15.2% |
| South                         | 2,450,867 | 60.3% | 119,204 | 63.6% | 104,315 | 66.2% | 4,270 | 66.2% | 4,921 | 64.8% |
| West                          | 188,052   | 4.6%  | 7,246   | 3.9%  | 5,774   | 3.7%  | 182   | 2.8%  | 339   | 4.5%  |

\*n=204 observations missing Sex variable

**eFigure 2.** Aggregate Percent of All Hospitalizations With Community-Onset SARS-CoV-2 Infection, Stratified by the Proportion of Hospitalizations Screened at Admission.

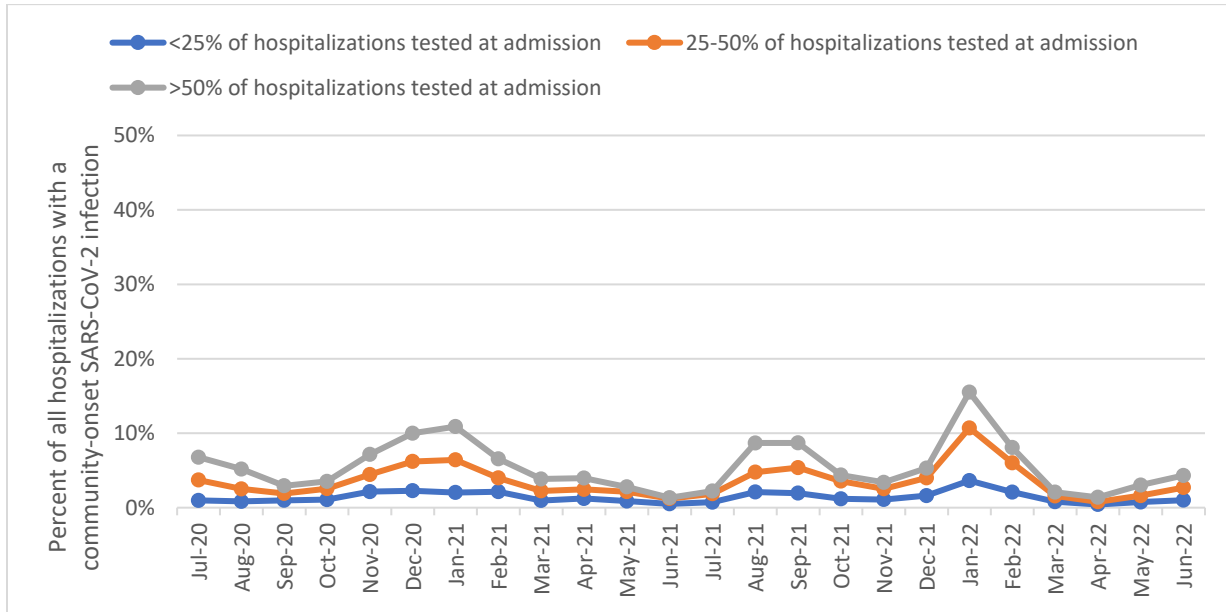

**eFigure 3.** Aggregate Percent of All Hospitalizations With Unknown-Onset SARS-CoV-2 Infection, Stratified by the Proportion of Hospitalizations Screened at Admission.

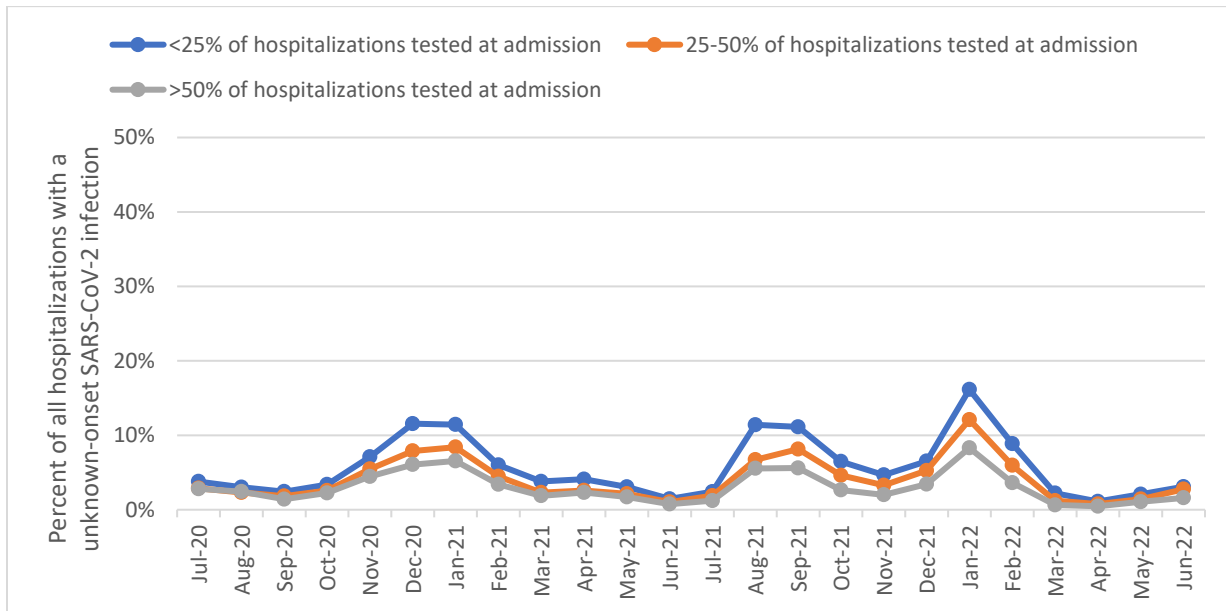

**eTable 2.** Hospital-Onset SARS-CoV-2 Infections, Stratified by Community-Onset SARS-CoV-2 Infection Rates

| Community Onset SARS-CoV-2 Infection Rates | Hospital-months (n) | Hospital-months with at least one hospital-onset SARS-CoV-2 infection (% of hospital-months) | Hospital-onset SARS-CoV-2 Infection Rate, Mean (95% Confidence Interval) |                                  |                      |                      |
|--------------------------------------------|---------------------|----------------------------------------------------------------------------------------------|--------------------------------------------------------------------------|----------------------------------|----------------------|----------------------|
|                                            |                     |                                                                                              | Overall                                                                  | Admissions Tested for SARS-CoV-2 |                      |                      |
|                                            |                     |                                                                                              |                                                                          | <25%                             | 25-50%               | >50%                 |
| <1%                                        | 1,679               | 274 (16.3)                                                                                   | 0.09<br>(0.05, 0.12)                                                     | 0.08<br>(0.04, 0.13)             | 0.10<br>(0.07, 0.14) | 0.07<br>(0.02, 0.12) |
| 1 - <2.5%                                  | 1,230               | 528 (42.9)                                                                                   | 0.20 (0.18, 0.22)                                                        | 0.23<br>(0.19, 0.28)             | 0.19<br>(0.16, 0.21) | 0.19<br>(0.14, 0.23) |
| 2.5 - <5%                                  | 1,139               | 586 (51.5)                                                                                   | 0.34<br>(0.30, 0.38)                                                     | 0.33<br>(0.25, 0.41)             | 0.37 (0.31, 0.42)    | 0.29<br>(0.22, 0.36) |
| 5% or more                                 | 1,639               | 829 (14.6)                                                                                   | 0.48<br>(0.44, 0.52)                                                     | 0.38 (0.23, 0.53)                | 0.52 (0.46, 0.59)    | 0.46<br>(0.40, 0.51) |
| All                                        | 5,687               | 2,217 (39.0)                                                                                 | 0.27<br>(0.26, 0.29)                                                     | 0.16<br>(0.13, 0.20)             | 0.32<br>(0.30, 0.35) | 0.32<br>(0.29, 0.35) |

**eFigure 4.** Aggregate Hospital-Onset SARS-CoV-2 Infection Rates Using 3 Definitions. Definition 1 includes first positive test after day 7; Definition 2 includes first positive test after day 10; Definition 3 includes first positive test after day 14.

(a) Percent of at-risk hospitalizations (i.e., hospitalizations with a length of stay at least as long as the definition period) with hospital-onset SARS-CoV-2 infections

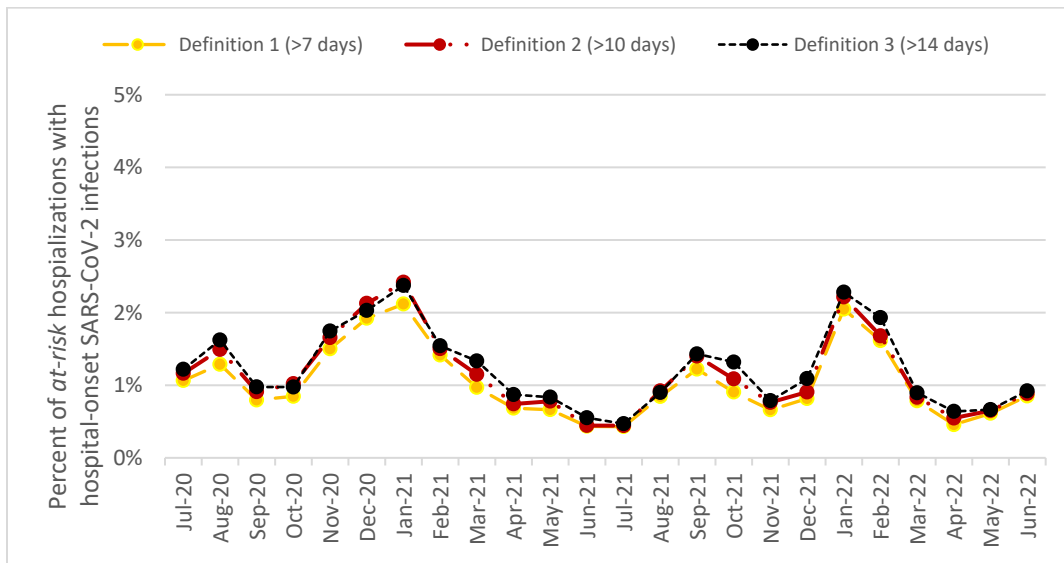

(b) Percent of all hospitalizations with hospital-onset SARS-CoV-2 infections

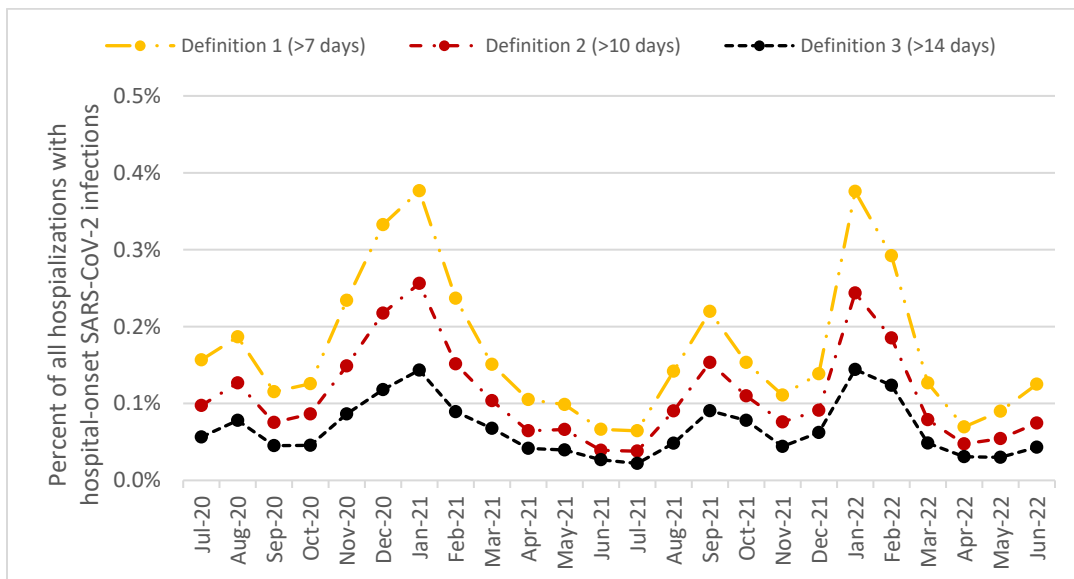

(c) Rate of hospital-onset SARS-CoV-2 infections per 1,000 patient days

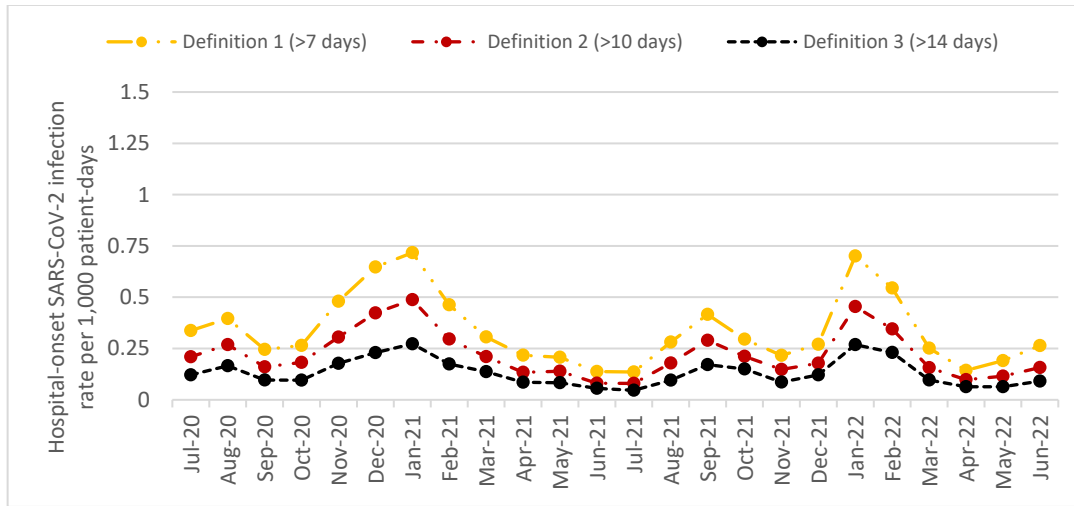

**eFigure 5.** Aggregate Hospital-Onset SARS-CoV-2 Infection Rates per 1000 Patient-Days Stratified by the Proportion of Hospitalizations Screened at Admission.

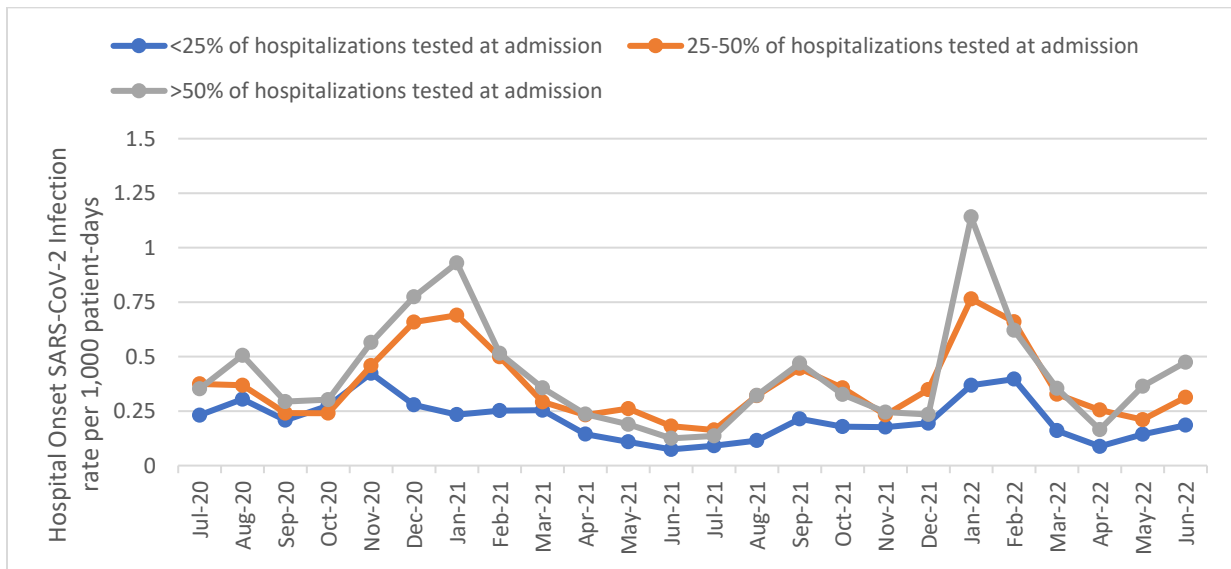

Supplement: jamanetwopen-e2329441-s001.pdf [file jamanetwopen-e2329441-s001.pdf]
