# Supplementary material for: Assessment of Hospital-Onset SARS-CoV-2 Infection Rates and Testing Practices in the US, 2020-2022
Source: PubMed Central journal article supplement (PMC10463096; doi:10.1001/jamanetworkopen.2023.29441), 2023-08-28
Supplement: jamanetwopen-e2329441-s002.pdf [file jamanetwopen-e2329441-s002.pdf]

## Data Sharing Statement

Hatfield. Assessment of Hospital-Onset SARS-CoV-2 Infection Rates and Testing Practices in the US. *JAMA Netw Open*. Published August 28, 2023.

doi:10.1001/jamanetworkopen.2023.29441

### Data

**Data available:** No

### Additional Information

**Explanation for why data not available:** Our analysis is based off proprietary datasets from PINC AI™ Applied Sciences Healthcare Data (see: <https://offers.pinc-ai.com/PINC-AI-Healthcare-Database-White-Paper-LP.html>).
